# Supplementary material for: Liquid ToF-SIMS revealing the oil, water, and surfactant interface evolution
Source: Royal Society of Chemistry journal article supplement (doi:10.1039/d0cp00528b), 2020-01-01
Supplement: d0cp00528b1.pdf [file d0cp00528b1.pdf]

Electronic Supplementary Information

**Liquid ToF-SIMS revealing the oil, water, and surfactant interfacial evolution**

Yanjie Shen<sup>a</sup>, Jenn Yao<sup>a, ‡</sup>, Jiyoung Son<sup>a, ‡</sup>, Zihua Zhu<sup>b</sup>, and Xiao-Ying Yu<sup>\*a</sup>

<sup>a</sup> Energy and Environment Directorate, Pacific Northwest National Laboratory, Richland, WA 99354

<sup>b</sup> Environmental Molecular Sciences Laboratory, Pacific Northwest National Laboratory, Richland, WA 99354, USA

<sup>‡</sup> Equal contributions

\*Corresponding author: [xiaoying.yu@pnnl.gov](mailto:xiaoying.yu@pnnl.gov); Tel: 509-372-4524; Fax: 509-375-2999

**Contents of this file**

Figures S1 to S8

Tables S1 to S5

## Contents

|                                                                                                                                                                    |     |
|--------------------------------------------------------------------------------------------------------------------------------------------------------------------|-----|
| Experimental.....                                                                                                                                                  | S1  |
| Dry sample preparation and static ToF-SIMS data acquisition.....                                                                                                   | S1  |
| Supplemental Figures .....                                                                                                                                         | S2  |
| <b>Figure S1a.</b> Representative in situ SEM images and histograms showing fresh bilge DSD determination. ....                                                    | S2  |
| <b>Figure S1b.</b> Representative in situ liquid SEM images and histograms showing aged bilge DSD determination. ....                                              | S3  |
| <b>Figure S2a.</b> Comparison of the DSD determination of bilgewater emulsions with X-100 added in six days at static conditions. ....                             | S4  |
| Error bars represent standard deviation of six measurements. ....                                                                                                  | S4  |
| <b>Figure S2b.</b> Comparison of the DSD determination of bilgewater emulsions with X-100 added in six days at gently rocking conditions.....                      | S5  |
| Error bars represent standard deviation of six measurements. ....                                                                                                  | S5  |
| <b>Figure S3a.</b> Raw spectra showing reproducibility of liquid SIMS analysis of aged emulsion in the positive mode in the $m/z^+$ range 1 to 200. ....           | S6  |
| <b>Figure S3b.</b> Raw spectra showing reproducibility of liquid SIMS analysis of aged emulsion in the positive mode in the $m/z^+$ range of 200 to 500. ....      | S7  |
| <b>Figure S3c.</b> Raw spectra showing reproducibility of liquid SIMS analysis of aged emulsion in the positive mode in the mass range of $m/z^+$ 500 to 800. .... | S8  |
| <b>Figure S4a.</b> Raw spectra showing reproducibility of liquid SIMS analysis of aged emulsion in the negative mode in the mass range of $m/z^-$ 0 to 200.....    | S9  |
| <b>Figure S4b.</b> Raw spectra showing reproducibility of liquid SIMS analysis of aged emulsion in the positive mode in the mass range of $m/z^-$ 200 to 500. .... | S10 |
| <b>Figure S4c.</b> Raw spectra showing reproducibility of liquid SIMS analysis of aged emulsion in the negative mode in the mass range of $m/z^-$ 500 to 800.....  | S11 |
| <b>Figure S5a.</b> Liquid SIMS spectral comparison of all samples in the positive ion mode in the mass range of $m/z^+$ 250 to 500. ....                           | S12 |
| <b>Figure S5b.</b> Liquid SIMS spectral comparison of all samples in the positive ion mode in the mass range of $m/z^+$ 500 to 800. ....                           | S13 |
| <b>Figure S6a.</b> Liquid SIMS spectral comparison of all samples in the negative ion mode in the mass range of $m/z^-$ 0 to 250.....                              | S14 |
| <b>Figure S6b.</b> Liquid SIMS spectral comparison of all samples in the negative ion mode in the mass range of $m/z^-$ 250 to 500. ....                           | S15 |
| <b>Figure S6c.</b> Liquid SIMS spectral comparison of all samples in the negative ion mode in the mass range of $m/z^-$ 500 to 800. ....                           | S16 |

|                                                                                                                                                                                                                                                                                                                                                                     |     |
|---------------------------------------------------------------------------------------------------------------------------------------------------------------------------------------------------------------------------------------------------------------------------------------------------------------------------------------------------------------------|-----|
| <b>Figure S7.</b> Spectral PCA of selected peaks of liquid samples in the positive mode: a) PC1 vs. PC3 scores plot; b) PC2 vs PC3 scores plot; and c) PC1, PC2 and PC3 loading plots.....                                                                                                                                                                          | S17 |
| <b>Figure S8</b> Static ToF-SIMS spectral comparison of synthetic bilgewater emulsion and key components: (a) $m/z^+$ 0-250, (b) 250-500 and (c) 500-800 in the positive ion mode. The green, red, blue and purple lines represent oil, detergent, newly formed and consumed components, respectively. (Adapted from Son et al. in Chemosphere). <sup>2</sup> ..... | S19 |
| Supplemental tables .....                                                                                                                                                                                                                                                                                                                                           | S21 |
| <b>Table S1.</b> Descriptions of bilge emulsion and main component mixtures for ToF-SIMS analysis .....                                                                                                                                                                                                                                                             | S21 |
| <b>Table S2.</b> Comparison of the droplet size distribution determination using in situ liquid SEM and optical microscopy .....                                                                                                                                                                                                                                    | S22 |
| <b>Table S3.</b> The bilgewater droplet size distribution changes with and without X-100 addition over six days determined by optical microscopy .....                                                                                                                                                                                                              | S23 |
| <b>Table S4.</b> Possible peak identification in the positive mode .....                                                                                                                                                                                                                                                                                            | S24 |
| <b>Table S5.</b> Possible peak identification in the negative mode .....                                                                                                                                                                                                                                                                                            | S26 |
| Reference .....                                                                                                                                                                                                                                                                                                                                                     | S27 |

Additional experiment details, figures and tables are provided to support the content in the main text.

## **Experimental**

### **Dry sample preparation and static ToF-SIMS data acquisition**

The same procedure used in previous synthetic bilgewater generation studies have been used to prepare synthetic bilge samples.<sup>1</sup> To make synthetic shipboard emulsion droplets, a homogenizer (Omni Tissue Master, Model 125, 10 mm generator probe) was used to initially mix the solution for 2 min. at 35,000 rpm; and 10 min. sonication at 40 kHz was followed to make a consistent mixture. The prepared emulsion samples were deposited on a clean silicon (Si) wafer and dried using N<sub>2</sub> in a chemical hood. Once dried, the samples were loaded on the sample holder for analysis.

A ToF-SIMS V instrument (IONTOF GmbH, Münster, Germany) was used. The pressure of the main chamber was maintained at  $\sim 1 \times 10^{-8}$  mbar during analysis. The primary ion beam was a 25 keV Bi<sub>3</sub><sup>+</sup> with 10 kHz pulse energy. The pulse width was 0.8 ns and the current was  $\sim 0.6$  pA. SIMS spectra were acquired by rastering over an area of 500×500  $\mu\text{m}^2$  for 60 scans.<sup>2</sup>

## Supplemental Figures

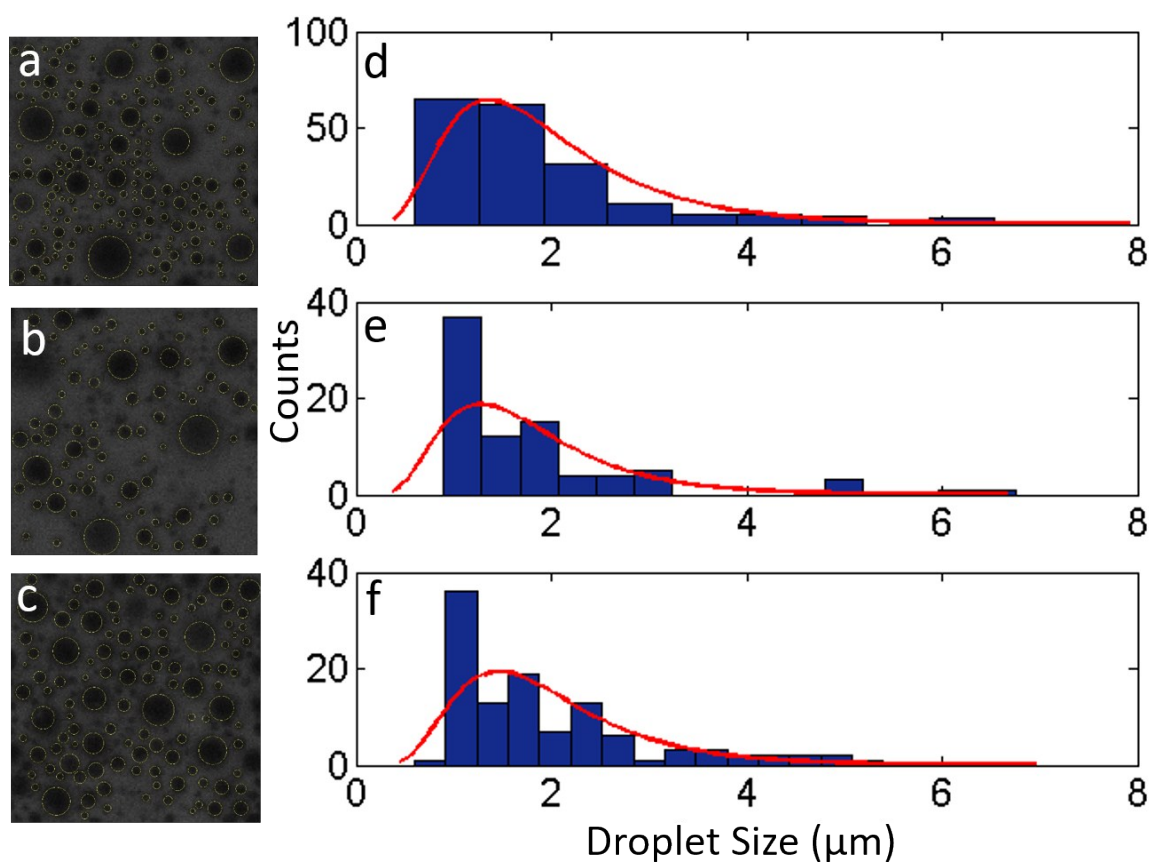

**Figure S1a.** Representative in situ SEM images and histograms showing fresh bilge DSD determination.

The droplet images were taken in three different SALVI devices shown in a, b, and c using in situ liquid SEM; and d, e, f were the corresponding histograms.

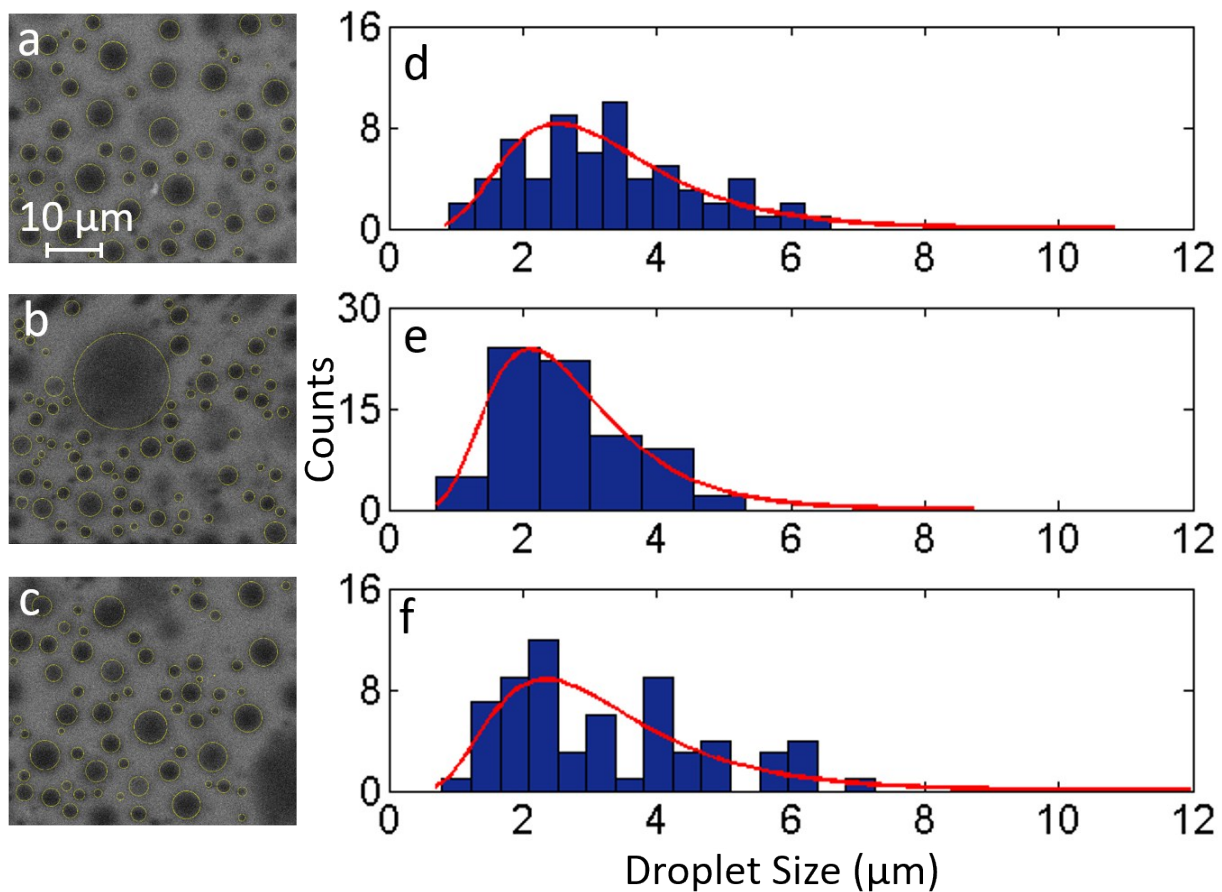

**Figure S1b.** Representative in situ liquid SEM images and histograms showing aged bilge DSD determination.

The droplet images were taken in three different SALVI devices shown in a, b, and c using in situ liquid SEM; and d, e, f were the corresponding histograms.

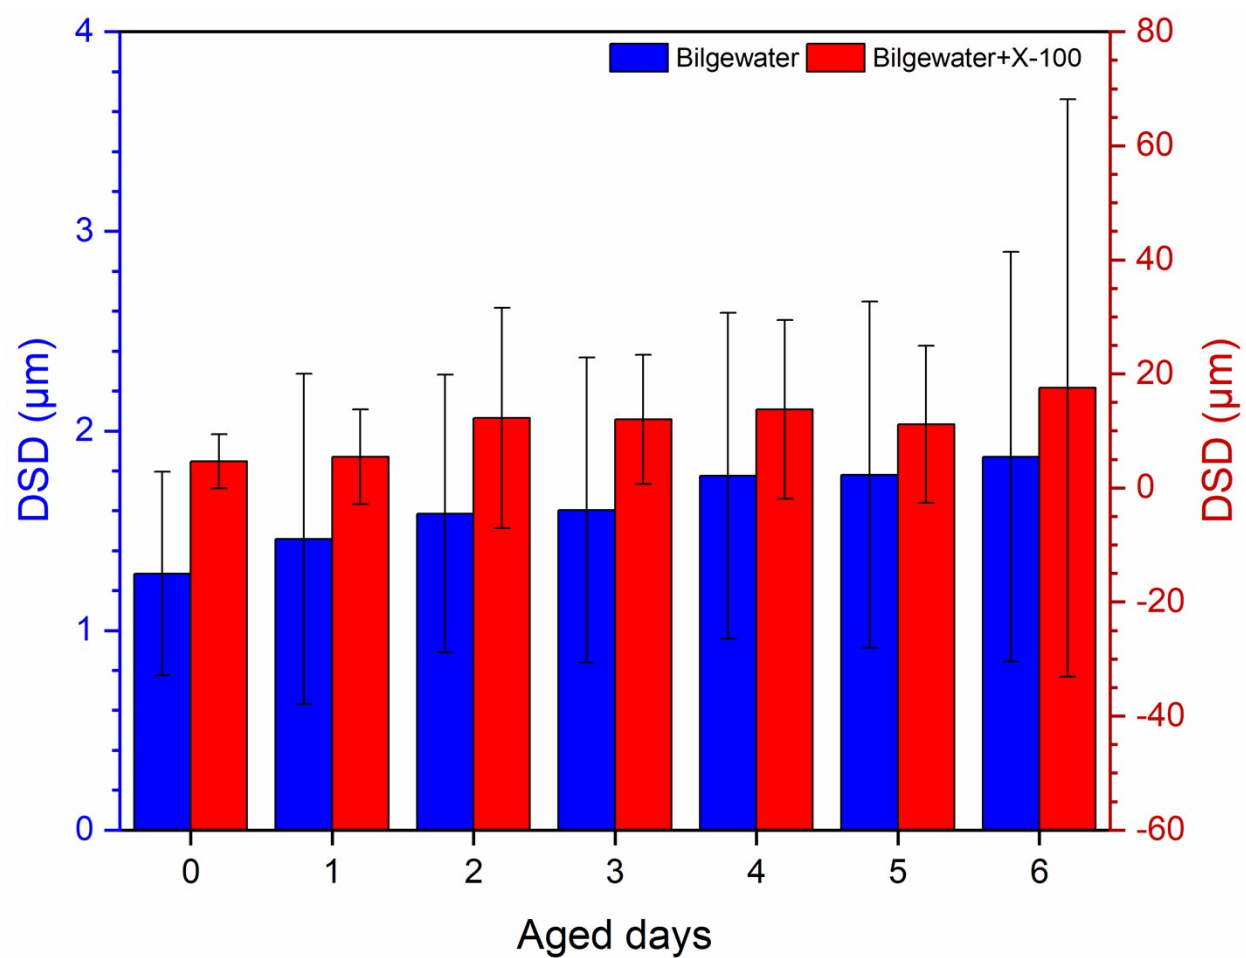

**Figure S2a.** Comparison of the DSD determination of bilgewater emulsions with X-100 added in six days at static conditions.

Error bars represent the standard deviation of six measurements.

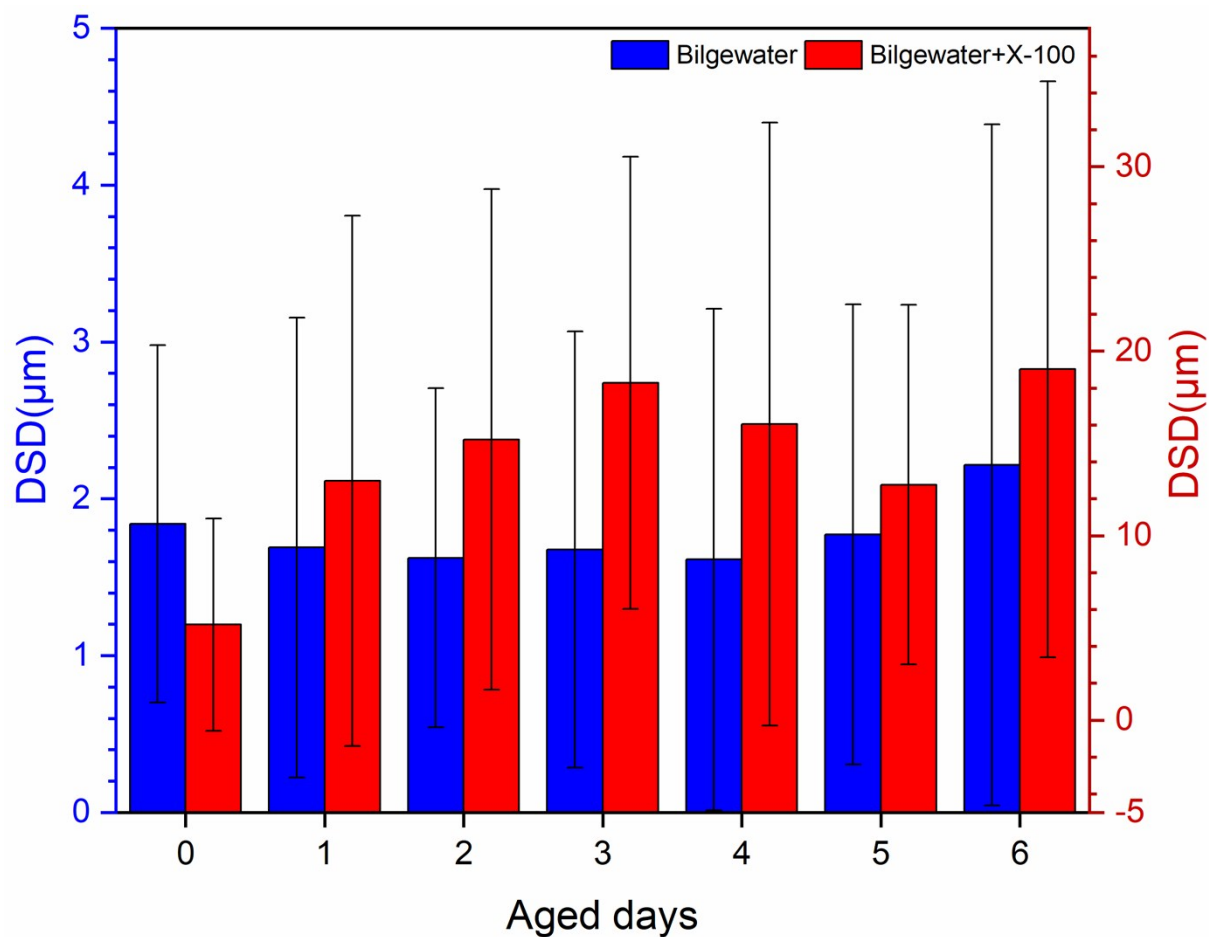

**Figure S2b.** Comparison of the DSD determination of bilgewater emulsions with X-100 added in six days at gently rocking conditions.

Error bars represent the standard deviation of six measurements. Figures S2a and 2b give the comparison of DSD determination of bilgewater emulsion with and without X-100 surfactant addition in six days at static and rocking conditions, respectively.



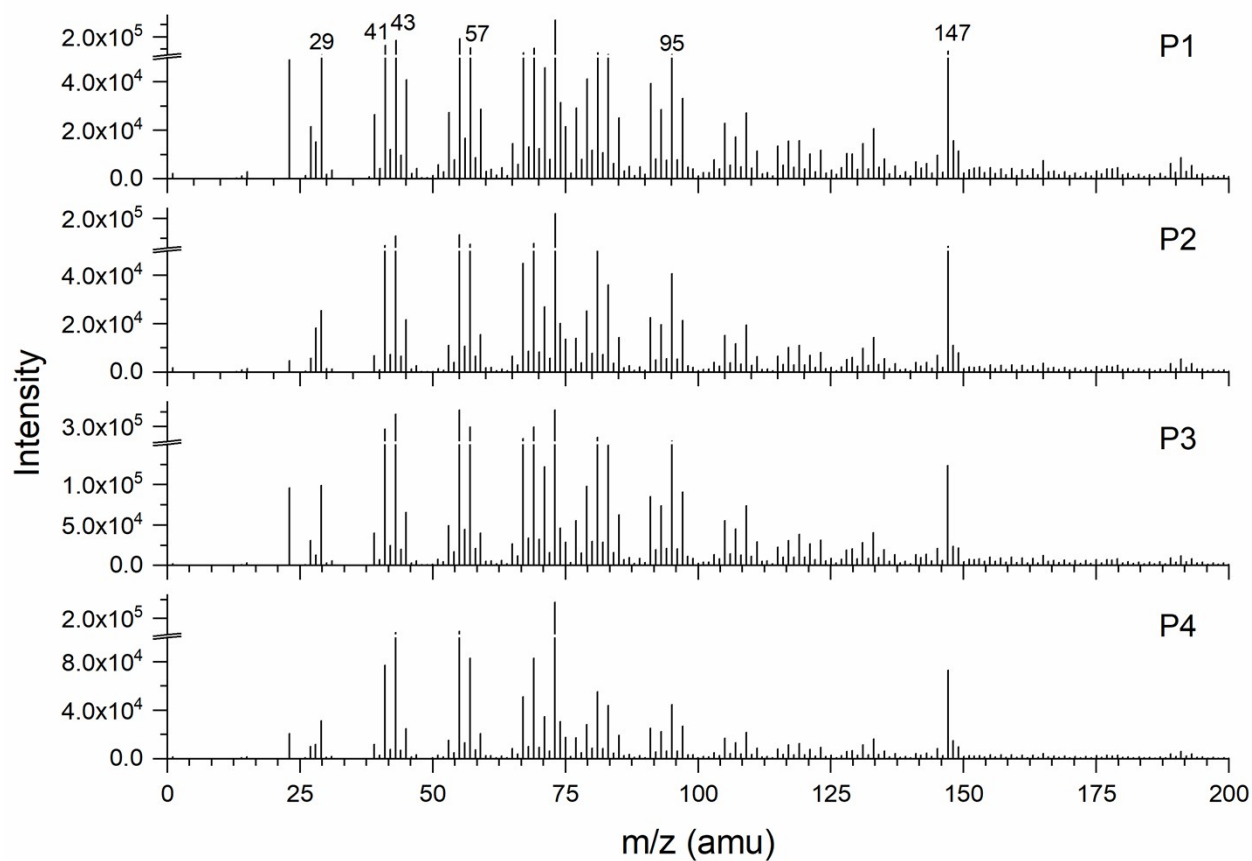

**Figure S3a.** Raw spectra showing reproducibility of liquid SIMS analysis of aged emulsion in the positive mode in the  $m/z^+$  range 1 to 200.

P1, P2, P3, and P4 represent the first, second, third, and fourth positive ion mode spectral data acquired consecutively of the aged bilge sample inside a SALVI device.

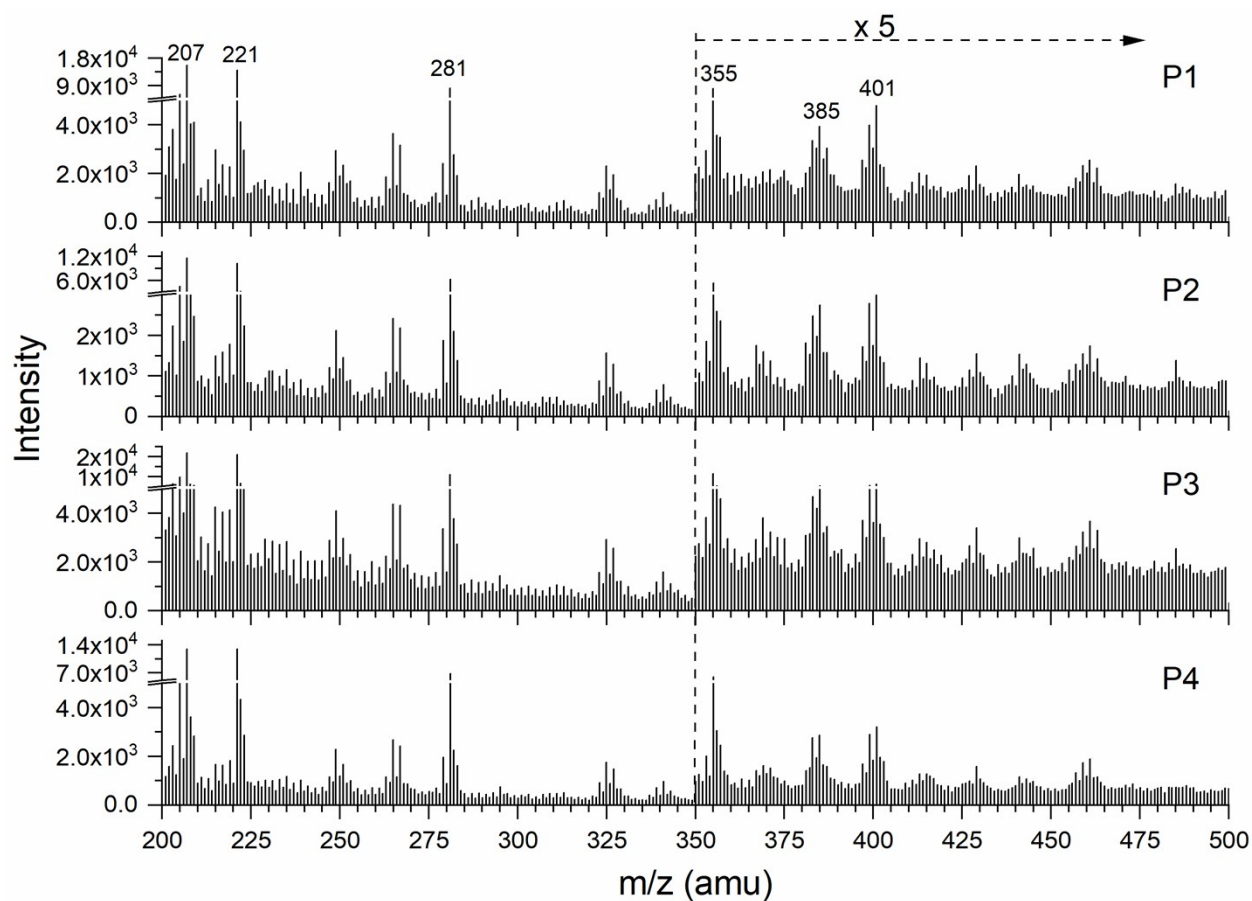

**Figure S3b.** Raw spectra showing reproducibility of liquid SIMS analysis of aged emulsion in the positive mode in the  $m/z^+$  range of 200 to 500.

P1, P2, P3, and P4 represent the first, second, third, and fourth positive ion mode spectral data acquired consecutively of the aged bilge sample inside a SALVI device.

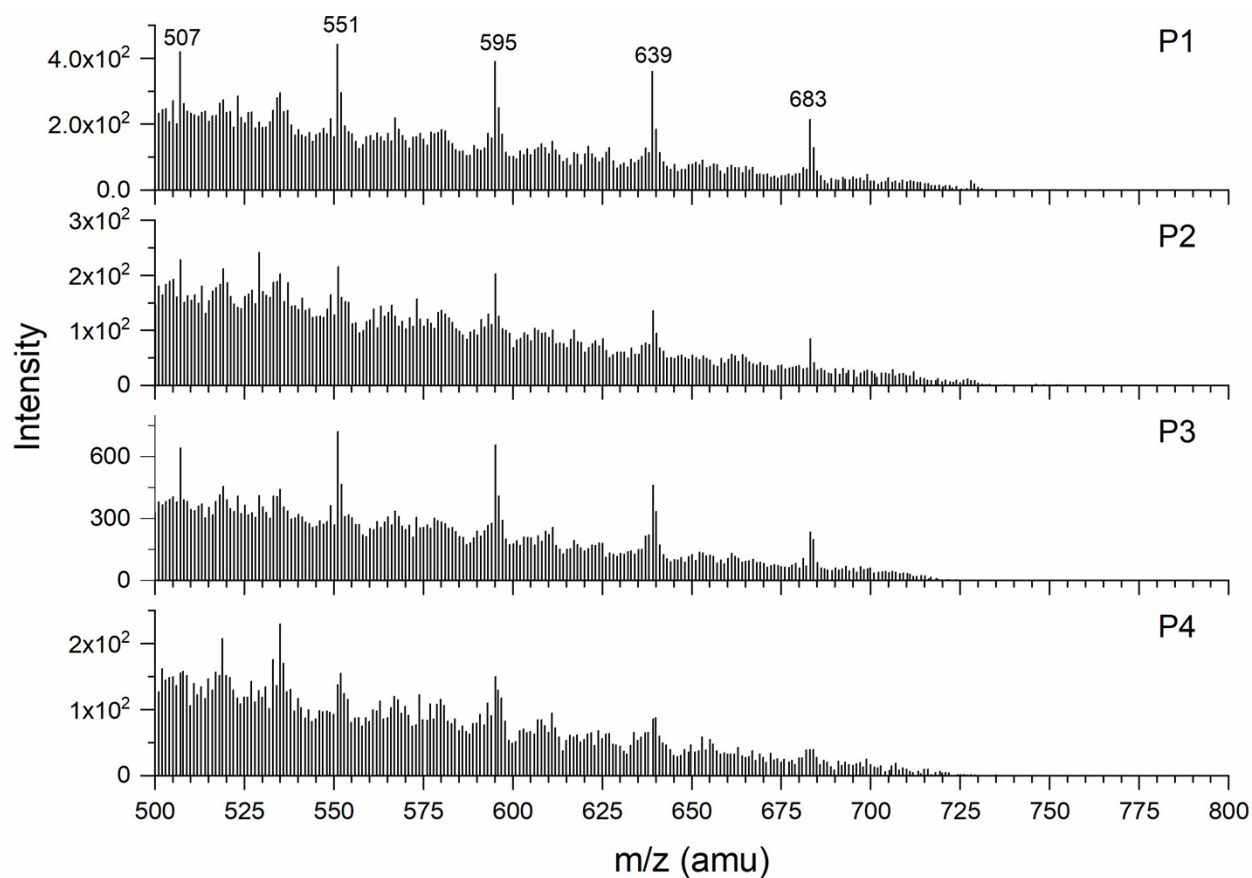

**Figure S3c.** Raw spectra showing reproducibility of liquid SIMS analysis of aged emulsion in the positive mode in the mass range of  $m/z^+$  500 to 800.

P1, P2, P3, and P4 represent the first, second, third, and fourth positive ion mode spectral data acquired consecutively of the aged bilge sample inside a SALVI device.

Overall, the liquid SIMS spectral comparison of the same samples in the positive ion mode show good reproducibility, thus giving assurance of data quality.

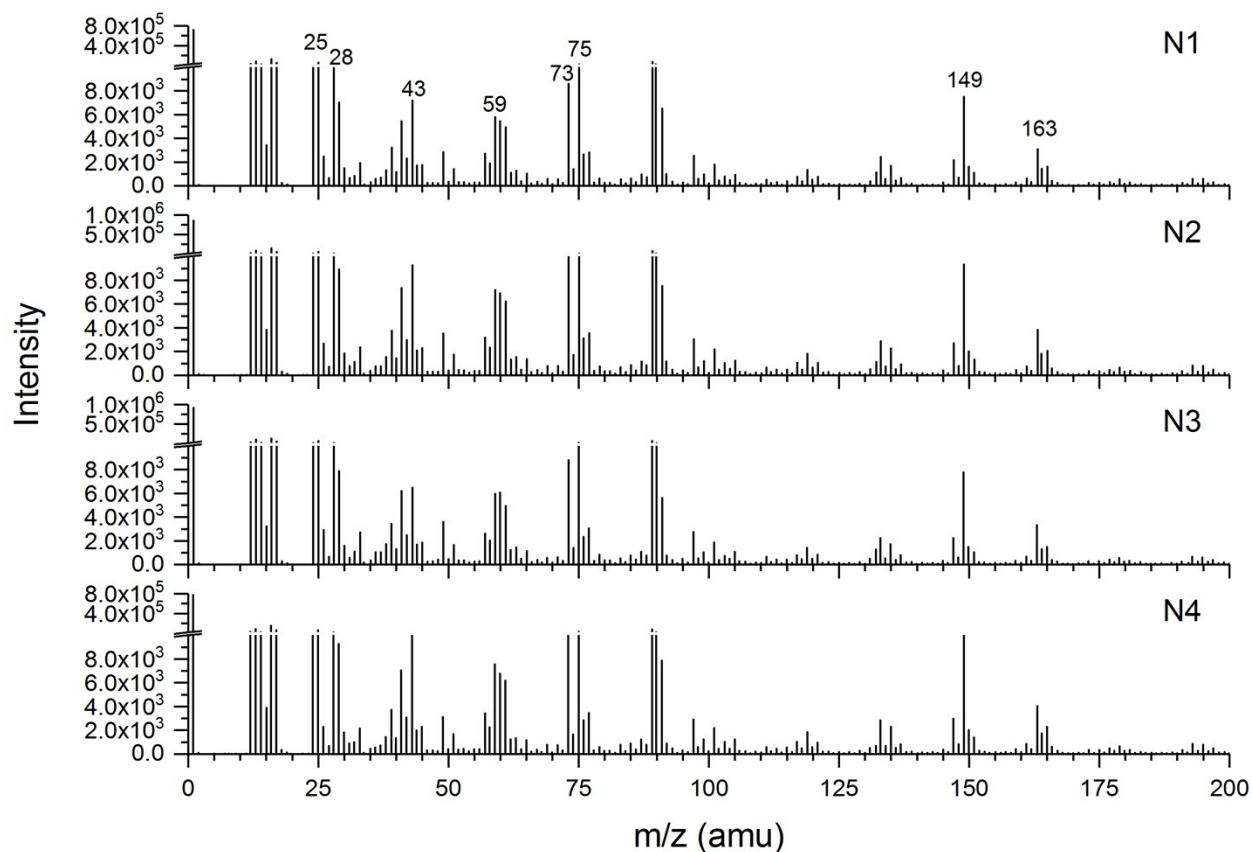

**Figure S4a.** Raw spectra showing reproducibility of liquid SIMS analysis of aged emulsion in the negative mode in the mass range of  $m/z$  0 to 200.

N1, N2, N3, and N4 represent the first, second, third, and fourth negative ion mode spectral data acquired consecutively of the aged bilge sample inside the SALVI device.

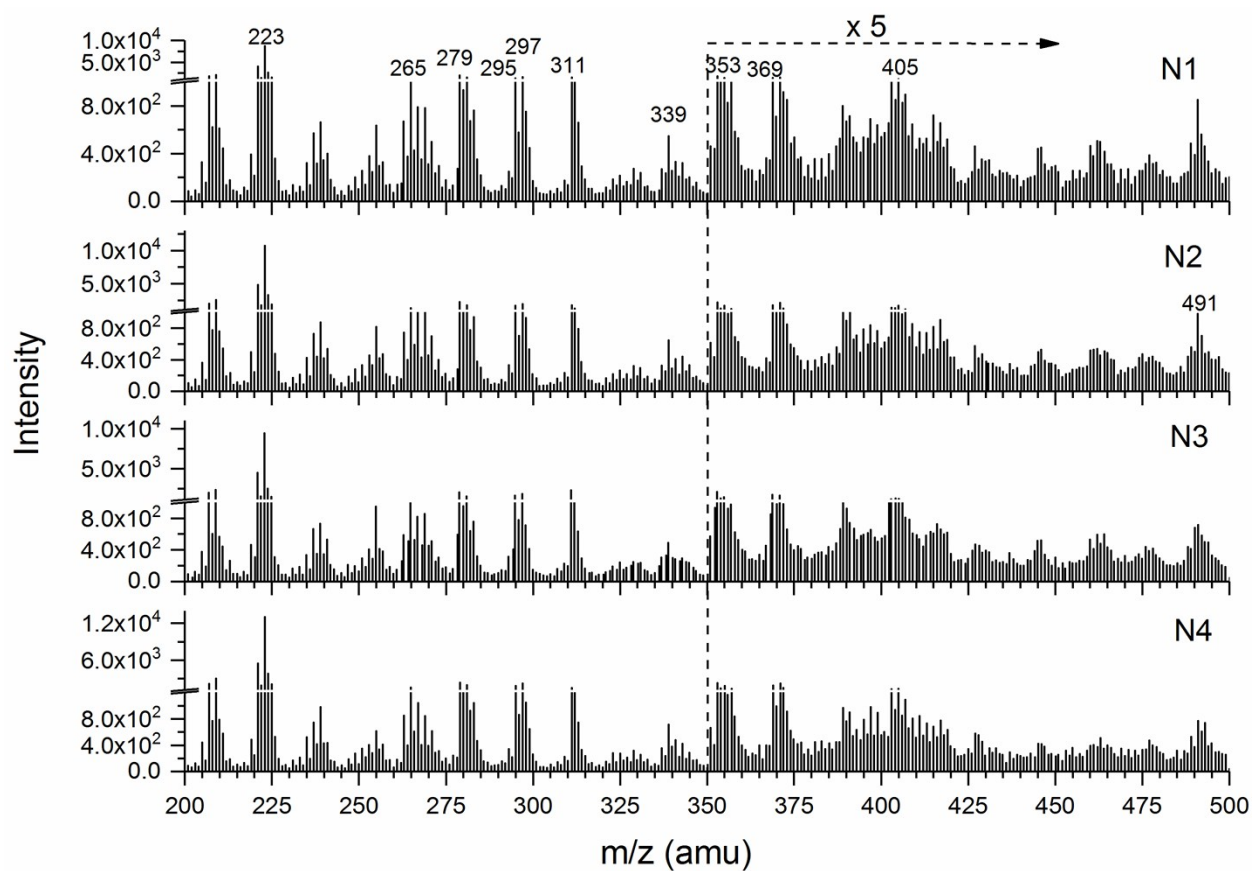

**Figure S4b.** Raw spectra showing reproducibility of liquid SIMS analysis of aged emulsion in the positive mode in the mass range of  $m/z$  200 to 500.

N1, N2, N3, and N4 represent the first, second, third, and fourth negative ion mode spectral data acquired consecutively of the aged bilge sample inside the SALVI device.

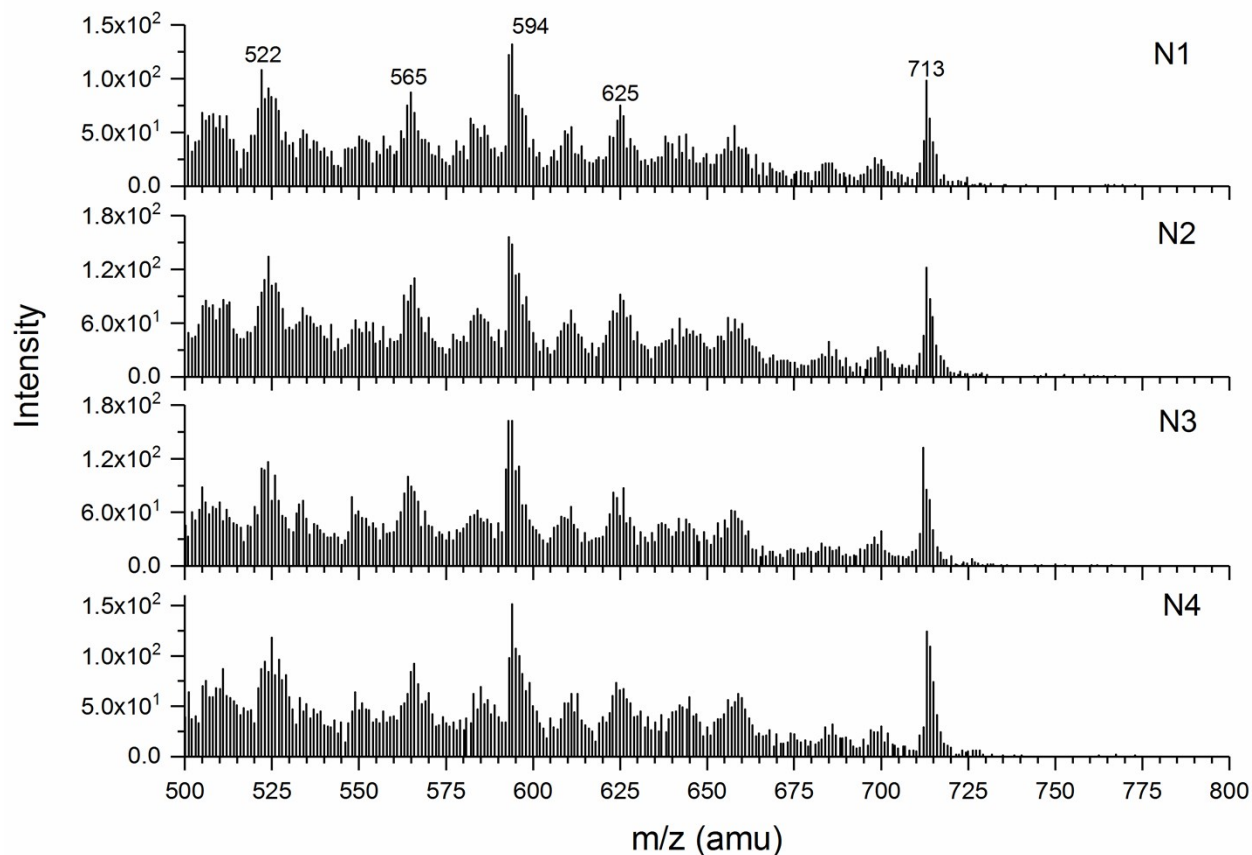

**Figure S4c.** Raw spectra showing reproducibility of liquid SIMS analysis of aged emulsion in the negative mode in the mass range of  $m/z$  500 to 800.

N1, N2, N3, and N4 represent the first, second, third, and fourth negative ion mode spectral data acquired consecutively of the aged bilge sample inside the SALVI device.

Overall, the liquid SIMS spectral comparison of the same samples in the negative ion mode show good reproducibility, thus giving us assurance of data quality.

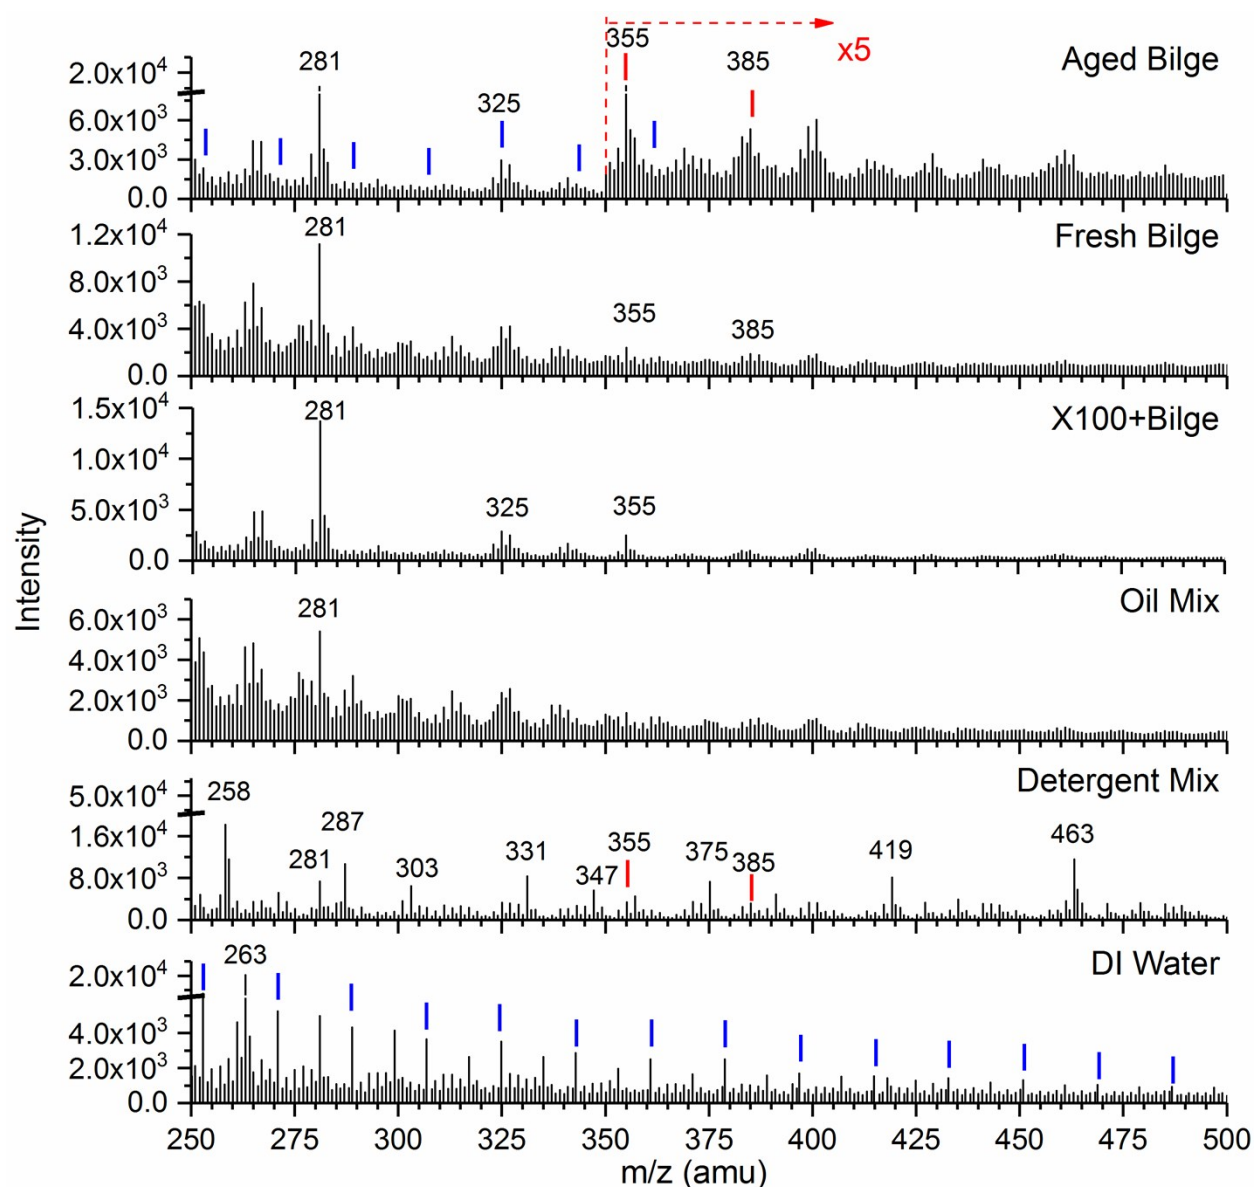

**Figure S5a.** Liquid SIMS spectral comparison of all samples in the positive ion mode in the mass range of  $m/z^+$  250 to 500.

Green, red, and blue bars represent oil, detergent, and water cluster peaks, respectively.

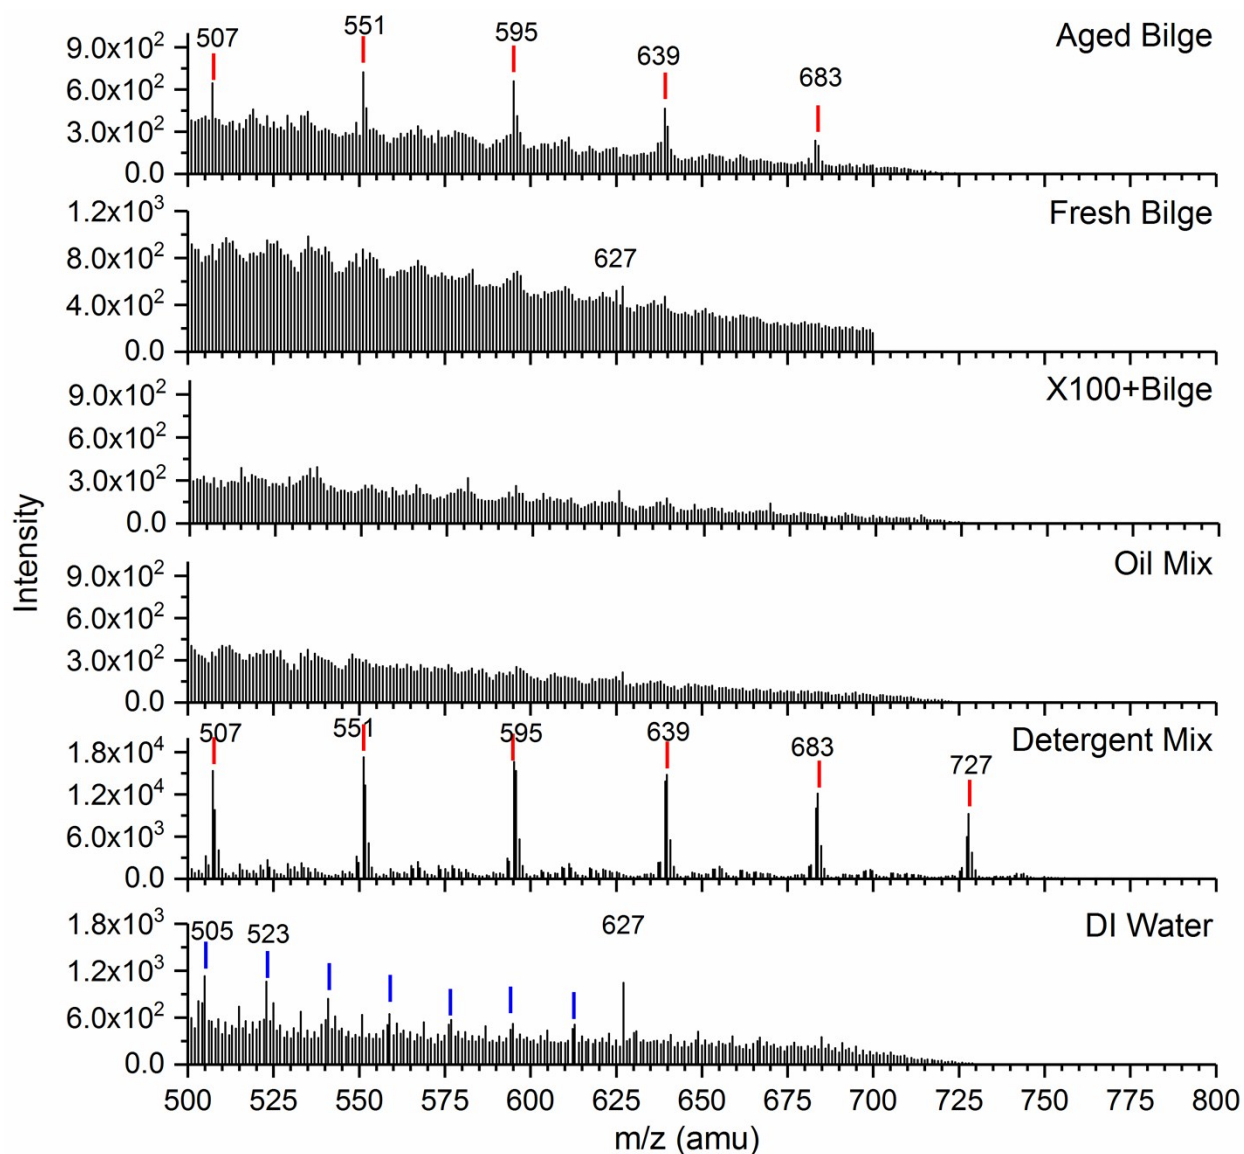

**Figure S5b.** Liquid SIMS spectral comparison of all samples in the positive ion mode in the mass range of  $m/z^+$  500 to 800.

Red and blue bars represent detergent and water cluster peaks, respectively.



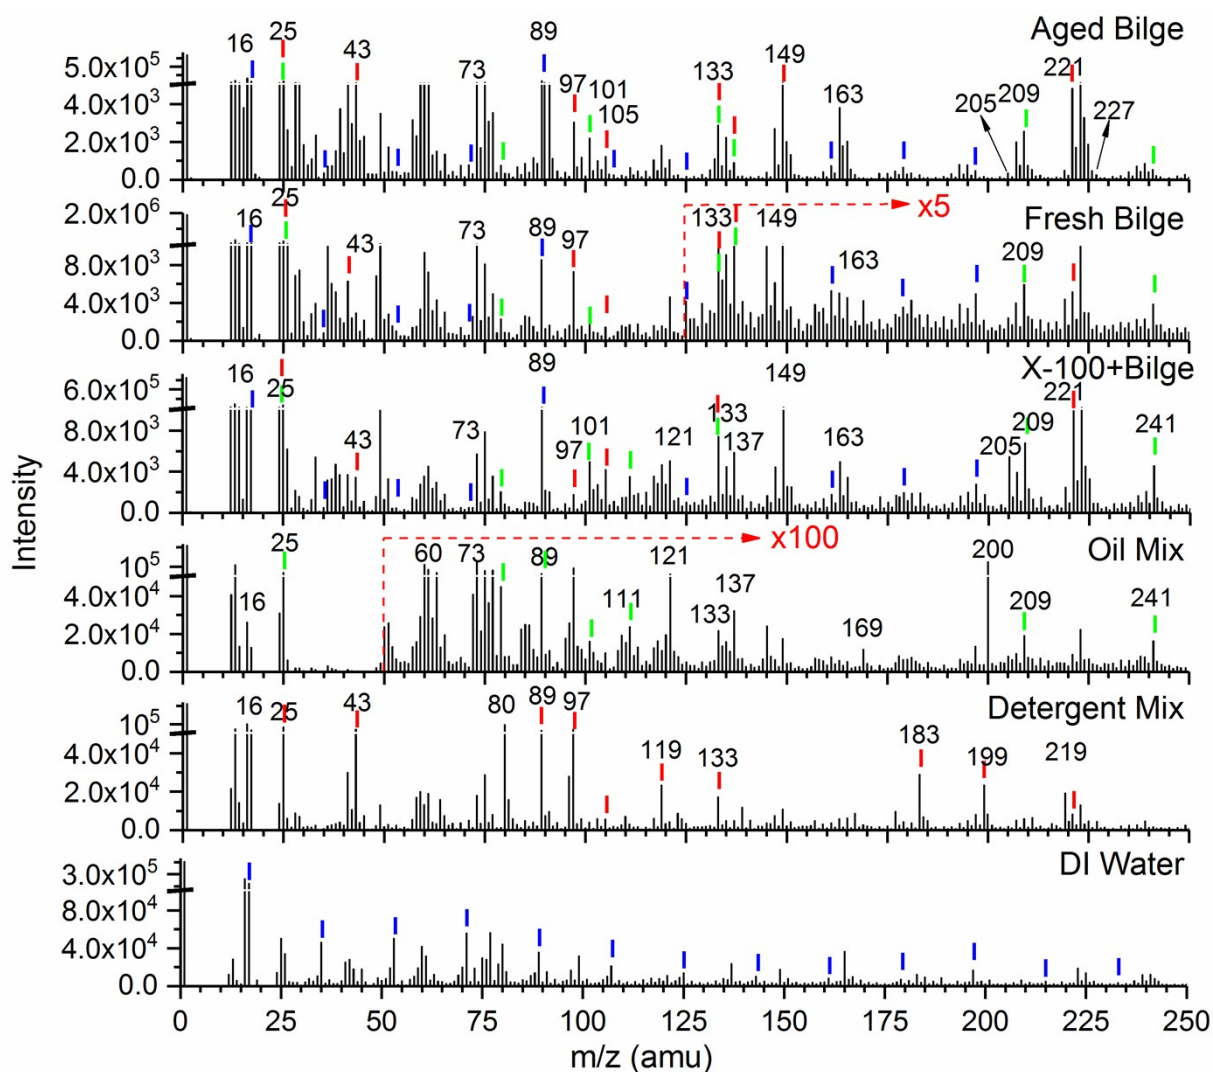

**Figure S6a.** Liquid SIMS spectral comparison of all samples in the negative ion mode in the mass range of  $m/z$  0 to 250.

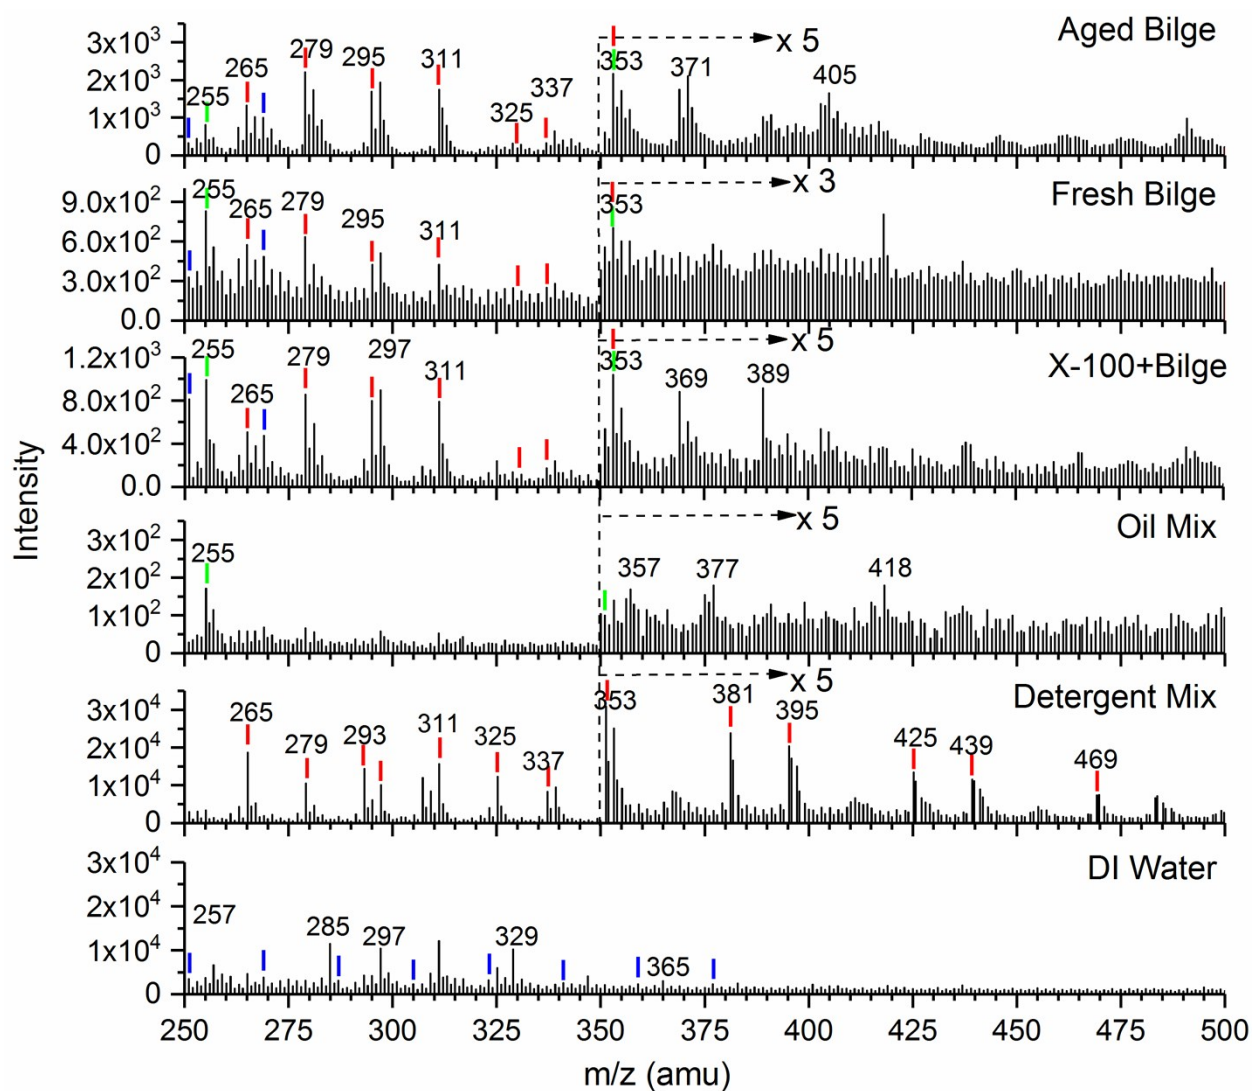

**Figure S6b.** Liquid SIMS spectral comparison of all samples in the negative ion mode in the mass range of  $m/z$ : 250 to 500.

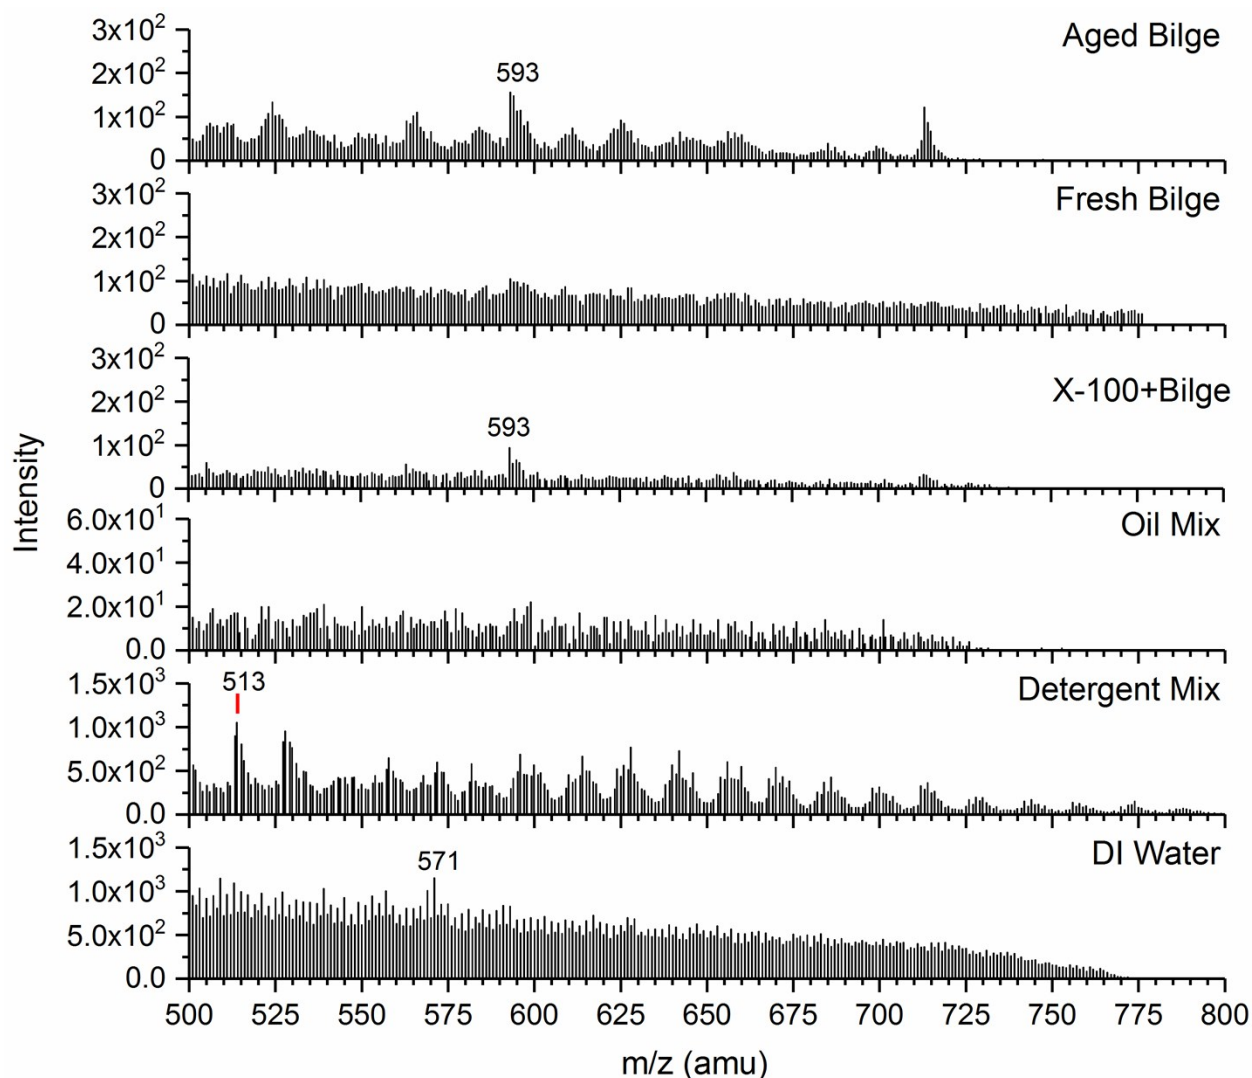

**Figure S6c.** Liquid SIMS spectral comparison of all samples in the negative ion mode in the mass range of  $m/z$ - 500 to 800.

Figures S6a, b, and c show liquid SIMS spectral comparison of the fresh bilge, aged bilge, X-100+fresh bilge, oil mix, detergent mix and DI water control in the negative ion mode. Oil components are observed in fresh bilge, aged bilge, and X-100+fresh bilge in the low mass range (i.e.,  $m/z$  1-250). Many characteristic peaks are identified as hydrocarbon, such as  $m/z$  25  $C_2H^-$ , 49  $C_4H^-$ , 63  $C_5H_3^-$ , and 79  $C_6H_7^-$ . In the higher mass range (i.e.,  $m/z$  250-500), the peaks that contribute to the bilge water spectra are mainly from detergent mix components, such as  $m/z$  279, 311, 325  $C_{18}H_{14}O_4P^-$ , and 337  $C_{20}H_{33}O_4^-$ . In the high mass range (i.e.,  $m/z$  500-800), oil peaks and detergent peaks are not significant contributors to the fresh bilge.

# Electronic Supplementary Information

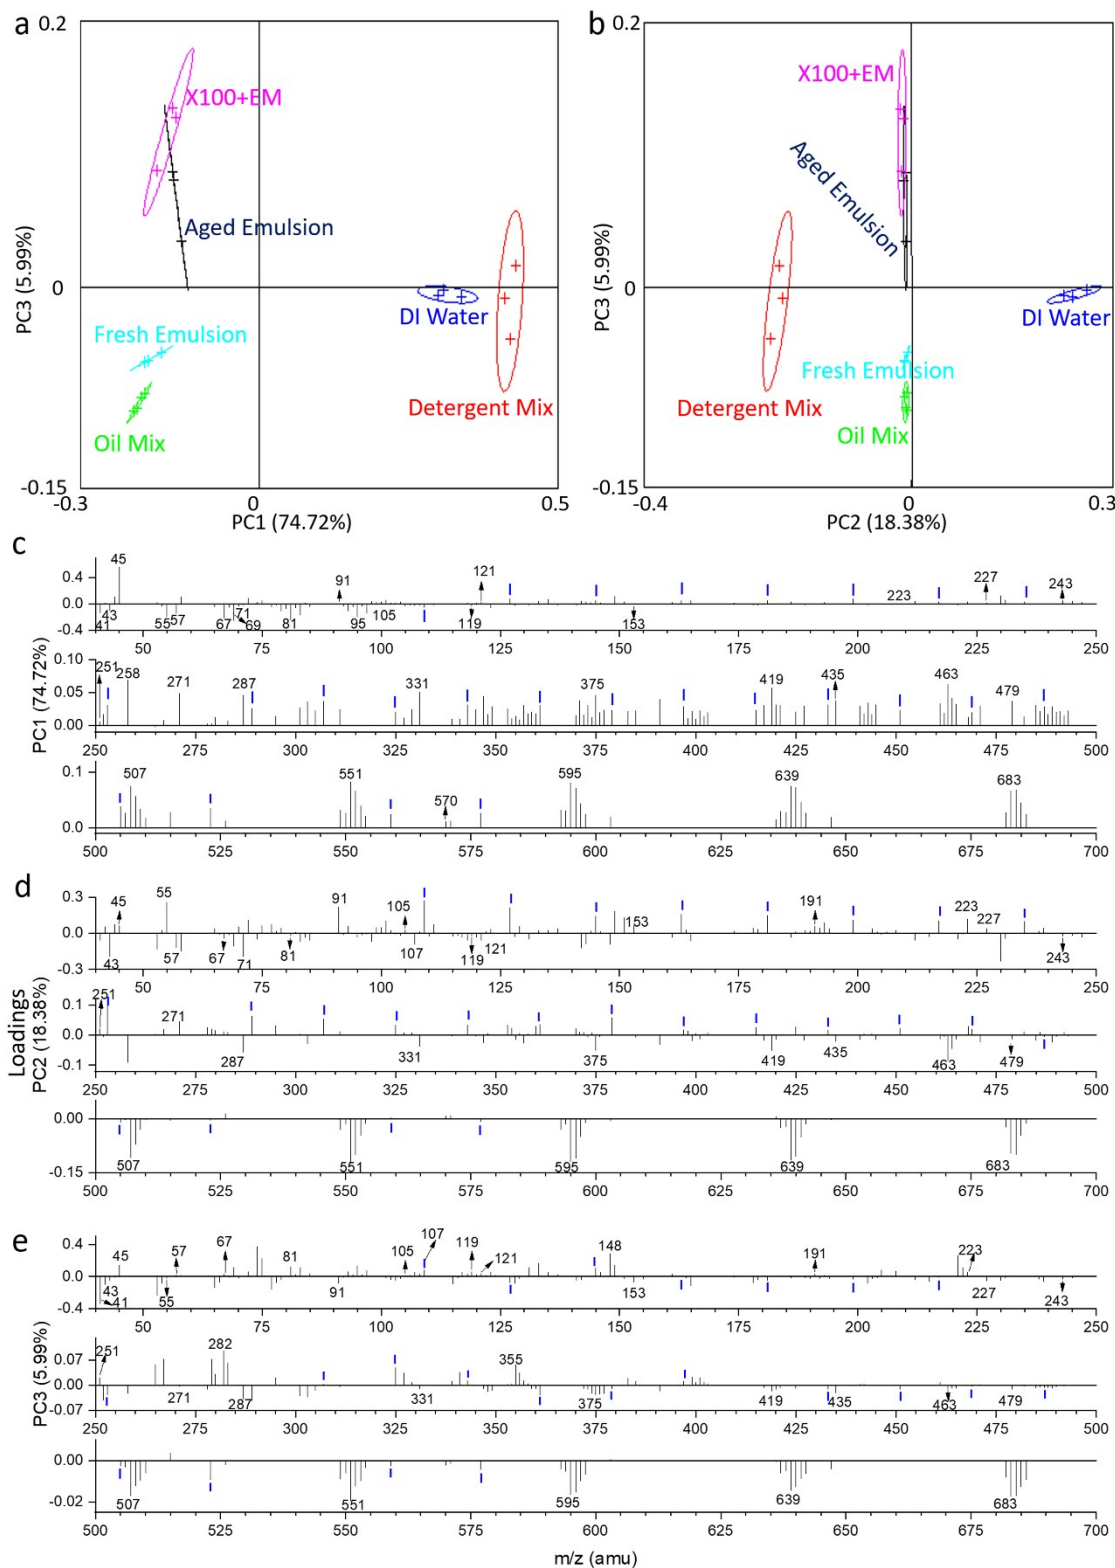

**Figure S7.** Spectral PCA of selected peaks of liquid samples in the positive mode: a) PC1 vs. PC3 scores plot; b) PC2 vs PC3 scores plot; and c) PC1, PC2 and PC3 loadings plots.

Figure S7 presents the scores plots of PC1 vs. PC3, PC2 vs. PC3, and principal components (PC1, PC2 and PC3) loadings plots in negative mode. In the positive mode, PC1, PC2 and PC3 explain 99.09% of all data. PC1 explains 74.72% of the data and mainly separates the DI water control and the detergent mix from the oil mix, fresh bilge, aged bilge and X-100+fresh bilge. PC2 explains 18.38% of the data and mainly separates the DI water from the aged bilge, fresh bilge, oil mix, and detergent mix. PC3 explains 5.99% of all data and mainly separates the DI water control, oil mix, and fresh bilge from aged bilge and X-100+fresh bilge.

Looking into the PC1 loadings, water cluster peaks are the main peaks that separate the detergent mix and DI water from the oil mix and fresh bilge. The identified detergent peaks are  $m/z^+$  45  $C_2H_5O^+$ , 223  $C_{12}H_{15}O_4^+$ , 227  $C_{13}H_{23}O_3^+$ , 251  $C_{16}H_{21}O_2^+$ , 271  $C_{17}H_{35}O_2^+$ , and a series of fragments of TPGS including  $m/z^+$  243  $C_{10}H_{20}O_5Na^+$ , 287  $C_{12}H_{24}O_6Na^+$ , 331  $C_{14}H_{28}O_7Na^+$ , 375  $C_{16}H_{32}O_8Na^+$ , 419  $C_{18}H_{36}O_{10}Na^+$ , 435  $C_{18}H_{36}O_{10}Na^+$ , 463  $C_{20}H_{40}O_{10}Na^+$ , 507  $C_{22}H_{44}O_{11}Na^+$ , 551  $C_{24}H_{48}O_{12}Na^+$ , 595  $C_{26}H_{52}O_{13}Na^+$ , 639  $C_{28}H_{56}O_{14}Na^+$ , and 683  $C_{30}H_{60}O_{15}Na^+$ . The water cluster peaks are observed in DI water and detergent mix in a wide range. In PC1 negative, oil mix, fresh bilge, aged bilge, and X-100+fresh bilge share common peaks. Most of them are identified as hydrocarbon fragments, such as  $m/z^+$  41  $C_3H_5^+$ , 43  $C_3H_7^+$ , 55  $C_4H_7^+$ , 57  $C_4H_9^+$ , 67  $C_5H_7^+$ , 69  $C_5H_9^+$ , 71  $C_5H_{11}^+$ , 81  $C_6H_9^+$ , and 105  $C_8H_9^+$ . In PC2 positive, DI water are separated from aged bilge, fresh bilge, X-100+fresh bilge, oil mix, and detergent mix. Aged bilge, fresh bilge, X-100+fresh bilge, oil mix and detergent mix share common components in the PC2 negative loadings, peaks that contribute to this commonality include hydrocarbon fragments such as  $m/z^+$  43  $C_3H_7^+$ , 57  $C_3H_7^+$ , 67  $C_5H_7^+$ , 71  $C_5H_{11}^+$ , 81  $C_6H_9^+$ , or 121  $C_9H_{13}^+$  and detergent components such as  $m/z^+$  107  $C^4H^{11}O_3^+$  and 119  $C_6H_{15}O_2^+$ , and a series of fragments of TPGS. In addition, large water clusters, such as  $(H_2O)_nH^+$ ,  $n=16-26$  make important contributions to the formation of bilge emulsion. In PC3 positive loadings, aged bilge emulsion and X-100+fresh emulsion are separated from the oil mix, DI water, and fresh bilge emulsion; detergent mix have both positive and negative scores. In PC3 positive, aged bilge and X-100+fresh emulsion share some peaks, including hydrocarbon fragments such as  $m/z^+$  57  $C_4H_9^+$ , 67  $C_5H_7^+$ , 81  $C_6H_9^+$ , 105  $C_8H_9^+$ , and 121  $C_9H_{13}^+$  and detergent components such as  $m/z^+$  45  $C_2H_5O^+$ , 107  $C_4H_{11}O_3^+$ , 119  $C_6H_{15}O_2^+$ , 191  $C_{10}H_{23}O_3^+$ , 223  $C_{12}H_{15}O_4^+$ , and 251  $C_{16}H_{27}O_2^+$ . In PC3 negative, hydrocarbon fragments, such as  $m/z^+$  41  $C_3H_5^+$ , 43  $C_3H_7^+$ , 55  $C_4H_7^+$ , or 91  $C_7H_7^+$ , detergent peaks, such as 153  $C_9H_{13}O_2^+$  and 227  $C_{13}H_{23}O_3^+$ , and fragments of TPGS are the main peaks. PC3 separates the fresh and aged bilge emulsion, indicating the surface change of bilge emulsion over time.



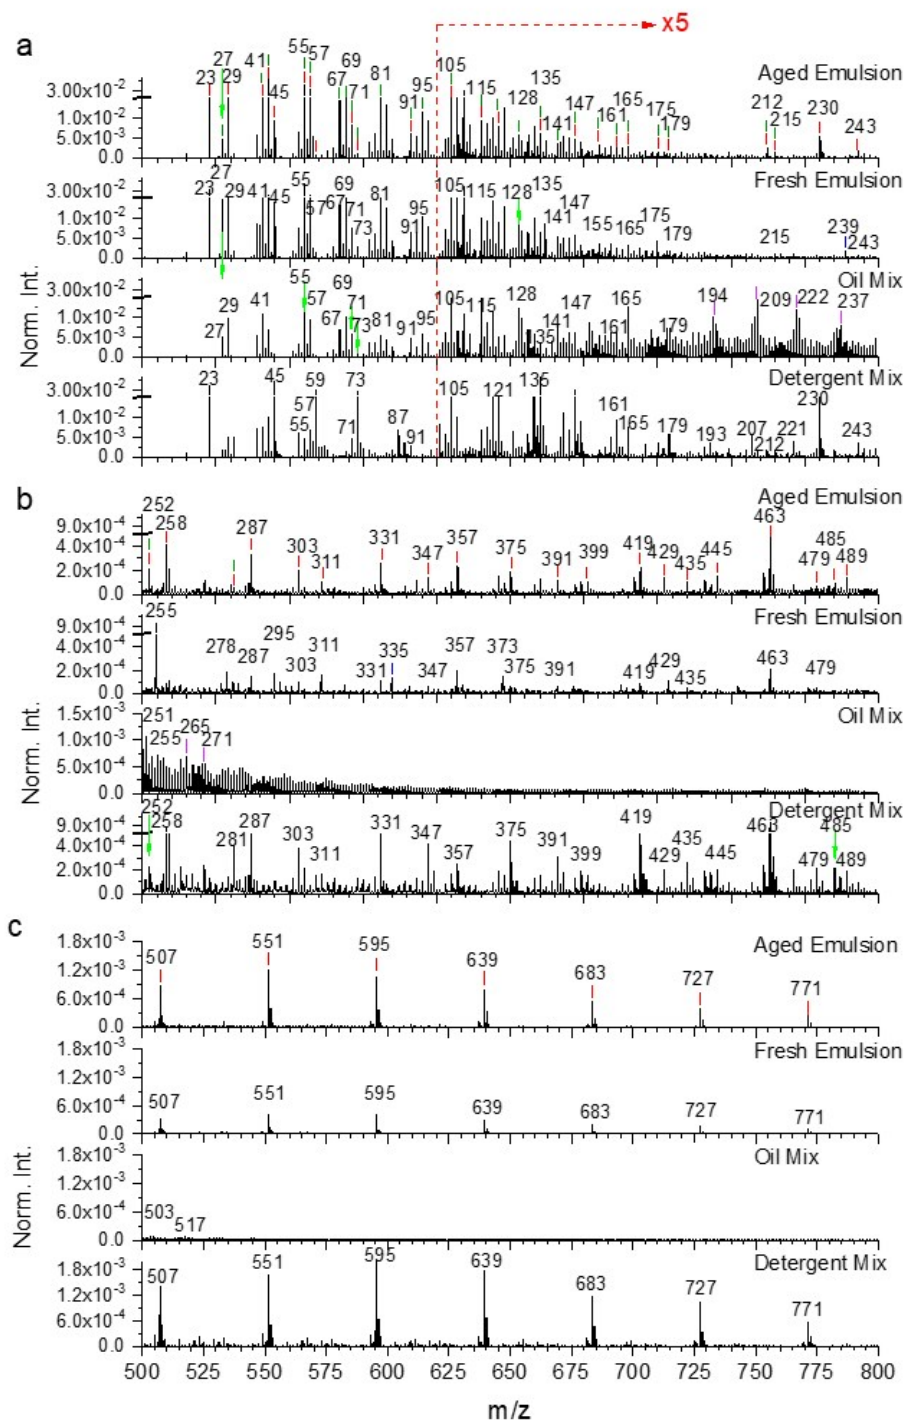

**Figure S8** Static ToF-SIMS spectral comparison of synthetic bilgewater emulsion and key components: (a)  $m/z^+$  0-250, (b) 250-500 and (c) 500-800 in the positive ion mode. The green, red, blue and purple lines represent oil, detergent, newly formed and consumed components, respectively. (Adapted from Son et al. in Chemosphere).<sup>2</sup>

Figure S8 is adapted from our recent publication of static ToF-SIMS analysis of dried emulsion samples. When comparing the static and dynamic SIMS imaging, the oil components

appear in the fresh emulsion and persist in the aged emulsion, indicating they are at the droplet surface (Fig. S8a). The same is true with small detergent components ( $m/z^+$  0-250). However, the relative high mass detergent components ( $m/z^+$  250-500), such as  $m/z^+$  331  $C_{14}H_{28}O_7Na^+$ , 347, 419  $C_{18}H_{36}O_9Na^+$ , and 463  $C_{20}H_{40}O_{10}Na^+$  do not appear in the fresh and aged bilgewater surface in dynamic SIMS (Fig. S5a), different from the observation in the static SIMS (See Fig. S8b). The high mass detergent components ( $m/z^+$  500-800) were observed only in aged bilgewater in dynamic SIMS (Fig. S5b). In static SIMS, high mass detergent components are more abundant in aged emulsion droplets (Fig. S8c). Because only dried samples can be analyzed in static SIMS, liquid information is lost. In contrast, liquid ToF-SIMS shows that the surface composition is indeed different between fresh and aged emulsion droplets.

**Supplemental tables****Table S1.** Descriptions of bilge emulsion and main component mixtures for ToF-SIMS analysis

| Sample name        | Descriptions                                                                                                                                                                                                           |
|--------------------|------------------------------------------------------------------------------------------------------------------------------------------------------------------------------------------------------------------------|
| Fresh bilge        | The fresh bilge consisted of 10 mL oil mix and 1 mL detergent mix. The fresh emulsion was injected into the SALVI channel immediately for further analysis.                                                            |
| Aged bilge         | The aged bilge was prepared using the same recipe of the fresh bilge emulsion and was allowed to stand for 24 hrs. before being introduced to the SALVI.                                                               |
| X100 + fresh bilge | The X100+fresh bilge sample consisted of 1 mL Triton X-100 and 10 mL fresh bilge. This sample was immediately analysis after preparation.                                                                              |
| Oil mix            | The oil mix sample consisted of 50% Diesel Fuel Marine (MIL-PRF-16884N), 25% 2190 TEP Stream Lube Oil (MIL-PRF-17331K), and 25% 9250 Diesel Lube Oil (MIL-PRF-9000L). Used as received.                                |
| Detergent mix      | The detergent mix consisted of 50% Type 1 General Purpose Detergent MIL-D-16791G (1), 25% Commercial Detergent Tide Ultra (Liquid), and 25% Degreasing Solvent (Kustom 221, MIL-PRF-680C, Type III). Used as received. |
| DI water control   | High purity DI water from the Millipore system                                                                                                                                                                         |

Liquid sample preparation was conducted in the fume hood to reduce possible air contamination. The bilge composition was the same as what recently published <sup>1</sup>. The liquid sample was injected into the SALVI channel immediately for further analysis. The preparation of DI water control followed existing procedures reported in our earlier publications <sup>3, 4</sup>.



**Table S2.** Comparison of the droplet size distribution determination using in situ liquid SEM and optical microscopy

| SEM        |      |      |               |      |        |
|------------|------|------|---------------|------|--------|
| Fresh      |      |      | $\mu\text{m}$ |      |        |
| Image      | 1    | 2    | 3             | Mean | Stdev* |
| Mean       | 2.03 | 1.83 | 1.20          | 1.69 | 0.43   |
| Median     | 1.88 | 1.50 | 1.87          | 1.75 | 0.22   |
| Variance   | 1.98 | 1.32 | 1.02          | 1.44 | 0.49   |
| Mode       | 1.15 | 1.14 | 1.14          | 1.14 | 0.01   |
| Aged 1 Day |      |      | $\mu\text{m}$ |      |        |
| Image      | 1    | 2    | 3             | Mean | Stdev* |
| Mean       | 3.29 | 2.82 | 3.25          | 3.12 | 0.26   |
| Median     | 3.17 | 2.38 | 2.85          | 2.80 | 0.40   |
| Variance   | 1.68 | 4.81 | 2.28          | 2.92 | 1.66   |
| Mode       | 2.68 | 2.33 | 2.45          | 2.49 | 0.18   |

\* The reported uncertainties are purely from statistical errors and they do not include the optical microscopy measurement limitation.

**Table S3.** The bilgewater droplet size distribution changes with and without X-100 addition over six days determined by optical microscopy

| Bilgewater                 |      | Static conditions  |       |       |       |       |       |
|----------------------------|------|--------------------|-------|-------|-------|-------|-------|
| Droplet Age Day            | 0    | 1                  | 2     | 3     | 4     | 5     | 6     |
| Average ( $\mu\text{m}$ )  | 1.29 | 1.46               | 1.59  | 1.60  | 1.78  | 1.78  | 1.87  |
| Variance ( $\mu\text{m}$ ) | 0.51 | 0.83               | 0.70  | 0.76  | 0.82  | 0.87  | 1.03  |
| Median ( $\mu\text{m}$ )   | 1.17 | 1.23               | 1.39  | 1.37  | 1.58  | 1.54  | 1.58  |
| Bilgewater+X-100           |      | Static conditions  |       |       |       |       |       |
| Droplet Age Day            | 0    | 1                  | 2     | 3     | 4     | 5     | 6     |
| Average ( $\mu\text{m}$ )  | 4.66 | 5.47               | 12.26 | 12.01 | 13.74 | 11.15 | 17.54 |
| Variance ( $\mu\text{m}$ ) | 4.72 | 8.31               | 19.29 | 11.29 | 15.69 | 13.79 | 50.64 |
| Median ( $\mu\text{m}$ )   | 3.13 | 3.08               | 2.99  | 7.41  | 8.91  | 4.72  | 12.25 |
| Bilgewater                 |      | Rocking conditions |       |       |       |       |       |
| Droplet Age Day            | 0    | 1                  | 2     | 3     | 4     | 5     | 6     |
| Average ( $\mu\text{m}$ )  | 1.84 | 1.69               | 1.62  | 1.68  | 1.61  | 1.77  | 2.22  |
| Variance ( $\mu\text{m}$ ) | 1.14 | 1.47               | 1.08  | 1.39  | 1.60  | 1.47  | 2.17  |
| Median ( $\mu\text{m}$ )   | 1.41 | 1.24               | 1.27  | 1.22  | 1.24  | 1.25  | 1.49  |
| Bilgewater+X-100           |      | Rocking conditions |       |       |       |       |       |
| Droplet Age Day            | 0    | 1                  | 2     | 3     | 4     | 5     | 6     |
| Average ( $\mu\text{m}$ )  | 5.17 | 12.98              | 15.22 | 18.28 | 16.05 | 12.77 | 19.01 |
| Variance ( $\mu\text{m}$ ) | 5.76 | 14.37              | 13.56 | 12.26 | 16.34 | 9.75  | 15.60 |
| Median ( $\mu\text{m}$ )   | 2.95 | 7.03               | 11.10 | 15.11 | 8.96  | 10.78 | 13.44 |

**Table S3** gives a general statistical summary of the droplet size evolution of bilgewater emulsions with and without X-100 enhancement over six days.

There is some discrepancy between in situ SEM and optical microscopy measurements, because in situ SEM uses much higher magnification (i.e.,  $\times 5000$  times). For micrometer-sized droplets, the optical microscope we have only offers up to 1000 times magnification. In addition, analysis depth is different. The SEM analysis volume is a sphere of approximately 1  $\mu\text{m}$  in diameter, whereas optical microscopy would offer larger depth. The latter may result in some interferences in droplet counting. However, optical microscopy is faster to perform compared to in situ SEM at present. Because in situ SEM is a new technique and a feed-through is not available for this experiment.

**Table S4.** Possible peak identification in the positive mode

| $m/z^+_{\text{exact}}$ | $m/z^+_{\text{obs.}}$ | Formula                                                        | Chemical description                             | Notes | References |
|------------------------|-----------------------|----------------------------------------------------------------|--------------------------------------------------|-------|------------|
| 22.990                 | 23                    | Na <sup>+</sup>                                                | Inorganic ion                                    |       | f          |
| 27.023                 | 27                    | C <sub>2</sub> H <sub>3</sub> <sup>+</sup>                     | Hydrocarbon                                      |       | f          |
| 29.039                 | 29                    | C <sub>2</sub> H <sub>5</sub> <sup>+</sup>                     | Hydrocarbon                                      |       | f          |
| 41.039                 | 41                    | C <sub>3</sub> H <sub>5</sub> <sup>+</sup>                     | Hydrocarbon                                      |       | f          |
| 43.055                 | 43                    | C <sub>3</sub> H <sub>7</sub> <sup>+</sup>                     | Hydrocarbon                                      |       | f          |
| 45.034                 | 45                    | C <sub>2</sub> H <sub>5</sub> O <sup>+</sup>                   | Alcohols or carbonyl                             |       | f          |
| 55.055                 | 55                    | C <sub>4</sub> H <sub>7</sub> <sup>+</sup>                     | Hydrocarbon                                      |       | f          |
| 57.070                 | 57                    | C <sub>4</sub> H <sub>9</sub> <sup>+</sup>                     | Hydrocarbon                                      |       | f          |
| 59.050                 | 59                    | C <sub>3</sub> H <sub>7</sub> O <sup>+</sup>                   | Alcohols or carbonyl                             |       | f          |
| 67.055                 | 67                    | C <sub>5</sub> H <sub>7</sub> <sup>+</sup>                     | Hydrocarbon                                      |       | f          |
| 69.070                 | 69                    | C <sub>5</sub> H <sub>9</sub> <sup>+</sup>                     | Hydrocarbon                                      |       | f          |
| 71.086                 | 71                    | C <sub>5</sub> H <sub>11</sub> <sup>+</sup>                    | Hydrocarbon                                      |       | f          |
| 81.070                 | 81                    | C <sub>6</sub> H <sub>9</sub> <sup>+</sup>                     | Hydrocarbon                                      |       | f          |
| 91.055                 | 91                    | C <sub>7</sub> H <sub>7</sub> <sup>+</sup>                     | Hydrocarbon                                      |       | f          |
|                        | 95                    | -- <sup>a</sup>                                                |                                                  | b     |            |
| 105.070                | 105                   | C <sub>8</sub> H <sub>9</sub> <sup>+</sup>                     | Hydrocarbon                                      |       | f          |
| 107.071                | 107                   | C <sub>4</sub> H <sub>11</sub> O <sub>3</sub> <sup>+</sup>     | Polyethylene glycol                              | e     | g          |
|                        | 115                   | -- <sup>a</sup>                                                |                                                  | b     |            |
| 119.107                | 119                   | C <sub>6</sub> H <sub>15</sub> O <sub>2</sub> <sup>+</sup>     | Ethanol, 2-butoxy-                               | e     | g          |
| 121.102                | 121                   | C <sub>9</sub> H <sub>13</sub> <sup>+</sup>                    | Hydrocarbon                                      |       | f          |
|                        | 128                   | -- <sup>a</sup>                                                |                                                  | b     |            |
|                        | 135                   | -- <sup>a</sup>                                                |                                                  | b, c  |            |
| 153.092                | 153                   | C <sub>9</sub> H <sub>13</sub> O <sub>2</sub> <sup>+</sup>     | 1-Phenoxypropan-2-ol                             |       | g          |
|                        | 161                   | -- <sup>a</sup>                                                |                                                  | b, c  |            |
|                        | 175                   | -- <sup>a</sup>                                                |                                                  | b, c  |            |
|                        | 179                   | -- <sup>a</sup>                                                |                                                  | b, c  |            |
| 191.165                | 191                   | C <sub>10</sub> H <sub>23</sub> O <sub>3</sub> <sup>+</sup>    | 2-Propanol, 1-(2-butoxy-1-                       | e     | g          |
|                        | 194                   | -- <sup>a</sup>                                                |                                                  | b     |            |
|                        | 212                   | -- <sup>a</sup>                                                |                                                  | c     |            |
|                        | 221                   | -- <sup>a</sup>                                                |                                                  | c     |            |
|                        | 222                   | -- <sup>a</sup>                                                |                                                  | b     |            |
| 223.097                | 223                   | C <sub>12</sub> H <sub>15</sub> O <sub>4</sub> <sup>+</sup>    | Diethyl phthalate<br>Cyclopentaneacetic acid, 3- | e     |            |
| 227.165                | 227                   | C <sub>13</sub> H <sub>23</sub> O <sub>3</sub> <sup>+</sup>    | oxo-2-pentyl-,methyl ester                       |       | g          |
|                        | 230                   | -- <sup>a</sup>                                                |                                                  | c     |            |
| 243.121                | 243                   | C <sub>10</sub> H <sub>20</sub> O <sub>5</sub> Na <sup>+</sup> | Fragment of TPGS                                 | d     | i          |
| 251.201                | 251                   | C <sub>16</sub> H <sub>27</sub> O <sub>2</sub> <sup>+</sup>    | Triton X-41                                      | e     | g          |
|                        | 252                   | -- <sup>a</sup>                                                |                                                  | c     |            |
|                        | 258                   | -- <sup>a</sup>                                                |                                                  | c     |            |
|                        |                       |                                                                | Hexadecanoic acid, methyl                        | e     |            |
| 271.264                | 271                   | C <sub>17</sub> H <sub>35</sub> O <sub>2</sub> <sup>+</sup>    | ester                                            |       | g          |

## Electronic Supplementary Information

| $m/z^+_{\text{exact}}$ | $m/z^+_{\text{obs.}}$ | Formula                                                         | Chemical description         | Notes | References |
|------------------------|-----------------------|-----------------------------------------------------------------|------------------------------|-------|------------|
|                        | 278                   |                                                                 | -- <sup>a</sup>              | c     |            |
| 287.147                | 287                   | C <sub>12</sub> H <sub>24</sub> O <sub>6</sub> Na <sup>+</sup>  | Fragment of TPGS             | d     | i          |
|                        | 295                   |                                                                 | -- <sup>a</sup>              | c     |            |
|                        | 303                   |                                                                 | -- <sup>a</sup>              | c     |            |
|                        | 311                   |                                                                 | -- <sup>a</sup>              | c     |            |
| 331.173                | 331                   | C <sub>14</sub> H <sub>28</sub> O <sub>7</sub> Na <sup>+</sup>  | Fragment of TPGS             | d     | h          |
|                        | 347                   |                                                                 | -- <sup>a</sup>              | c     |            |
|                        | 357                   |                                                                 | -- <sup>a</sup>              | c     |            |
|                        | 373                   |                                                                 | -- <sup>a</sup>              | c     |            |
| 375.199                | 375                   | C <sub>16</sub> H <sub>32</sub> O <sub>8</sub> Na <sup>+</sup>  | Fragment of TPGS             | d     | h          |
|                        | 391                   |                                                                 | -- <sup>a</sup>              | c     |            |
| 419.225                | 419                   | C <sub>18</sub> H <sub>36</sub> O <sub>9</sub> Na <sup>+</sup>  | Fragment of TPGS             | d     | h          |
| 435.220                | 435                   | C <sub>18</sub> H <sub>36</sub> O <sub>10</sub> Na <sup>+</sup> | Fragment of TPGS             | d     | h          |
|                        | 445                   |                                                                 | -- <sup>a</sup>              | c     |            |
| 463.251                | 463                   | C <sub>20</sub> H <sub>40</sub> O <sub>10</sub> Na <sup>+</sup> | Fragment of TPGS             | d     | h          |
|                        |                       |                                                                 |                              |       |            |
| 479.246                | 479                   | C <sub>20</sub> H <sub>40</sub> O <sub>11</sub> Na <sup>+</sup> | Fragment of TPGS             | d     | h          |
|                        | 489                   |                                                                 | -- <sup>a</sup>              | c     |            |
| 507.278                | 507                   | C <sub>22</sub> H <sub>44</sub> O <sub>11</sub> Na <sup>+</sup> | Fragment of TPGS             | d     | h          |
| 551.304                | 551                   | C <sub>24</sub> H <sub>48</sub> O <sub>12</sub> Na <sup>+</sup> | Fragment of TPGS             | d     | h          |
| 570.377                | 570                   | C <sub>31</sub> H <sub>54</sub> O <sub>9</sub> <sup>+</sup>     | Alkyl aryl polyether alcohol | e     | g          |
| 595.330                | 595                   | C <sub>26</sub> H <sub>52</sub> O <sub>13</sub> Na <sup>+</sup> | Fragment of TPGS             | d     | h          |
| 639.356                | 639                   | C <sub>28</sub> H <sub>56</sub> O <sub>14</sub> Na <sup>+</sup> | Fragment of TPGS             | d     | h          |
| 683.382                | 683                   | C <sub>30</sub> H <sub>60</sub> O <sub>15</sub> Na <sup>+</sup> | Fragment of TPGS             | d     | h          |
| 727.409                | 727                   | C <sub>32</sub> H <sub>64</sub> O <sub>16</sub> Na <sup>+</sup> | Fragment of TPGS             | d     | h          |
| 771.435                | 771                   | C <sub>34</sub> H <sub>68</sub> O <sub>17</sub> Na <sup>+</sup> | Fragment of TPGS             | d     | h          |

<sup>a</sup>. not assigned; <sup>b</sup>. Detergent component; <sup>c</sup>. Oil component; <sup>d</sup>. Fragment of D- $\alpha$ -tocopheryl polyethylene glycol succinate (TPGS);<sup>5</sup> <sup>e</sup>. Based on the molecular weight; <sup>f</sup>. Reference is from Li et al.;<sup>6</sup> <sup>g</sup>. Reference is from PubChem database. When looking for information of a chemical, the CASRN is used to locate the exact chemical and its associated information;<sup>7</sup> <sup>h</sup>. Reference is from Wei et al.<sup>8</sup> <sup>i</sup>. Reference is from Son et al.<sup>2</sup>

**Table S4** gives more detailed peak identification information in the positive ion mode. PDMS interference peaks were not included.

**Table S5.** Possible peak identification in the negative mode

| $m/z_{\text{exact}}$ | $m/z_{\text{obs.}}$ | Formula                                          | Chemical description | Notes | References |
|----------------------|---------------------|--------------------------------------------------|----------------------|-------|------------|
| 13.008               | 13                  | $\text{CH}^-$                                    | Hydrocarbon          |       | e          |
| 25.008               | 25                  | $\text{C}_2\text{H}^-$                           | Hydrocarbon          |       | e          |
|                      | 43                  |                                                  | -- <sup>a</sup>      | b     |            |
| 49.008               | 49                  | $\text{C}_4\text{H}^-$                           | Hydrocarbon          |       | e          |
| 63.023               | 63                  | $\text{C}_5\text{H}_3^-$                         | Hydrocarbon          |       | e          |
| 79.055               | 79                  | $\text{C}_6\text{H}_7^-$                         | Hydrocarbon          |       | e          |
| 96.960               | 97                  | $\text{HSO}_4^-$                                 | Inorganic Ion        |       | e          |
| 101.060              | 101                 | $\text{C}_5\text{H}_9\text{O}_2^-$               | Fatty acid           | d     | f          |
| 105.055              | 105                 | $\text{C}_4\text{H}_9\text{O}_3^-$               | Polyethylene glycol  | d     | f          |
|                      | 111                 |                                                  | -- <sup>a</sup>      | c     |            |
| 115.076              | 115                 | $\text{C}_6\text{H}_{11}\text{O}_2^-$            | Fatty acid           | e     | f          |
|                      | 119                 |                                                  | -- <sup>a</sup>      | b     |            |
|                      | 133                 |                                                  | -- <sup>a</sup>      | b, c  |            |
|                      | 137                 |                                                  | -- <sup>a</sup>      | b, c  |            |
| 205.217              | 205                 | $\text{C}_{12}\text{H}_{29}\text{O}_2^-$         | Polyethylene glycol  | d     | f          |
|                      | 219                 |                                                  | -- <sup>a</sup>      | b     |            |
| 221.081              | 221                 | $\text{C}_{12}\text{H}_{13}\text{O}_4^-$         | Diethyl Phthalate    | d     | f          |
| 227.201              | 227                 | $\text{C}_{14}\text{H}_{27}\text{O}_2^-$         | Tetradecanoic acid   | d     | f          |
| 255.232              | 255                 | $\text{C}_{16}\text{H}_{31}\text{O}_2^-$         | n-Hexadecanoic acid  | d     | f          |
| 265.157              | 265                 | $\text{C}_{12}\text{H}_{26}\text{O}_4\text{P}^-$ | Tributyl phosphate   | d     | f          |
| 269.248              | 269                 | $\text{C}_{17}\text{H}_{33}\text{O}_2^-$         | Fatty acid           |       | g          |
| 277.144              | 277                 | $\text{C}_{16}\text{H}_{21}\text{O}_4^-$         | DBP                  | d     | f          |
|                      | 293                 |                                                  | -- <sup>a</sup>      | b     |            |
|                      | 297                 |                                                  | -- <sup>a</sup>      | b, c  |            |
|                      | 307                 |                                                  | -- <sup>a</sup>      | b     |            |
|                      | 311                 |                                                  | -- <sup>a</sup>      | b     |            |
| 325.063              | 325                 | $\text{C}_{18}\text{H}_{14}\text{O}_4\text{P}^-$ | Triphenyl phosphate  |       | f          |
| 337.238              | 337                 | $\text{C}_{20}\text{H}_{33}\text{O}_4^-$         | Triton X-41          |       | f          |
|                      | 351                 |                                                  | -- <sup>a</sup>      | b     |            |
|                      | 353                 |                                                  | -- <sup>a</sup>      | b, c  |            |
|                      | 381                 |                                                  | -- <sup>a</sup>      | b     |            |
|                      | 395                 |                                                  | -- <sup>a</sup>      | b     |            |
| 425.290              | 425                 | $\text{C}_{24}\text{H}_{41}\text{O}_6^-$         | Triton X-45          |       | f          |
|                      | 439                 |                                                  | -- <sup>a</sup>      | b     |            |
|                      | 469                 |                                                  | -- <sup>a</sup>      | b     |            |
|                      | 483                 |                                                  | -- <sup>a</sup>      | b     |            |
| 513.343              | 513                 | $\text{C}_{28}\text{H}_{49}\text{O}_8^-$         | Triton X-114         |       | f          |

<sup>a</sup>. not assigned; <sup>b</sup>. Detergent component; <sup>c</sup>. Oil component; <sup>d</sup>. Based on the molecular weight; <sup>e</sup>. Reference is from Li et al.;<sup>6</sup> <sup>f</sup>. Reference is from PubChem database. When looking for information of a chemical, the CASRN is used to locate the exact chemical and its associated information;<sup>7</sup> <sup>g</sup>. Reference is from Leefmann et al.<sup>9</sup>

**Table S5** gives more detailed peak identification information in the negative ion mode. PDMS interference peaks were not included.

## Reference

1. J. Church, D. M. Paynter and W. H. Lee, *Langmuir*, 2017, **33**, 9731-9739.
2. J. Son, Y. Shen, J. Yao, D. Paynter and X.-Y. Yu, *Chemosphere*, 2019, **236**, 124345.
3. Y. Fu, Y. Zhang, F. Zhang, J. Chen, Z. Zhu and X.-Y. Yu, *Atmos. Environ.*, 2018, **191**, 36-45.
4. X. Sui, Y. Zhou, F. Zhang, Y. Zhang, J. Chen, Z. Zhu and X.-Y. Yu, *Surf. Interf. Anal.*, 2018, **50**, 927-938.
5. J. Zhang, Q. Xue, X. Pan, Y. Jin, W. Lu, D. Ding and Q. Guo, *Chemical Engineering Journal*, 2017, **307**, 643-649.
6. W. Li, H. Li, J. Li, X. Cheng, Z. Zhang, F. Chai, H. Zhang, T. Yang, P. Duan, D. Lu and Y. Chen, *J Environ Sci (China)*, 2018, **69**, 61-76.
7. NIH, PubChem, <https://pubchem.ncbi.nlm.nih.gov/>, Accessed April 15, 2019, 2019.
8. J. Wei, A. Bristow, E. McBride, D. Kilgour and P. B. O'Connor, *Analytical Chemistry*, 2014, **86**, 1567-1574.
9. T. Leefmann, C. Heim, A. Kryvenda, S. Siljeström, P. Sjövall and V. Thiel, *Organic Geochemistry*, 2013, **57**, 23-33.
